# Supplementary material for: Metabolic response of Scapharca subcrenata to heat stress using GC/MS-based metabolomics
Source: PeerJ. 2020 Jan 28;8:e8445. doi: 10.7717/peerj.8445 (PMC6993748; doi:10.7717/peerj.8445)
Supplement: Supplemental Information 5 [file peerj-08-8445-s005.xls]

## Sheet: metabolic rates
Oxygen consumption rates									Ammonia excretion rates
20°C	Time	2h	12h	24h	48h	72h			20°C	Time	2h	12h	24h	48h	72h
replicates	1	0.343875	0.435975	0.402791	0.301317	0.00128576			replicates	1	20.6996	42.1754	27.214	48.7081	29.5317
	2	0.253179	0.549241	0.304151	0.477902	0.716086				2	31.1642	31.2957	36.1547	35.4371	31.7035
	3	0.585954	0.477128	0.236144	0.201486	0.385907				3	63.0081	53.558	52.3238	30.4389	37.168
24°C	Time	2h	12h	24h	48h	72h			24°C	Time	2h	12h	24h	48h	72h
replicates	1	0.249698	0.85541	1.09373	0.578752	0.90861			replicates	1	60.2257	73.3702	47.7542	32.2813	44.1718
	2	0.110642	0.655979	0.706714	0.776195	0.305498				2	47.7	81.0062	44.3487	99.1135	25.2289
	3	0.0913269	1.12635	1.15804	0.898813	0.902376				3	87.7715	77.5021	44.2436	118.086	26.5374
28°C	Time	2h	12h	24h	48h	72h			28°C	Time	2h	12h	24h	48h	72h
replicates	1	0.63978	1.13496	1.10524	0.844349	1.20956			replicates	1	59.9742	89.2878	37.3285	50.926	160.912
	2	0.779758	0.712518	0.504449	0.564096	0.667729				2	99.2021	49.824	18.3285	64.402	194.342
	3	1.36075	0.36839	0.656328	0.604244	1.68832				3	96.1759	60.5803	11.3648	52.944	170.13
32°C	Time	2h	12h	24h	48h	72h			32°C	Time	2h	12h	24h	48h	72h
replicates	1	0.986444	1.20163	1.71306	1.36068	1.61496			replicates	1	124.023	46.2186	126.709	123.803	143.649
	2	1.07932	0.497587	0.82783	1.65019	1.22342				2	106.652	46.2988	58.6002	163.637	105.876
	3	1.74107	0.975303	1.09932	1.58107	1.28064				3	148.092	46.5175	76.0686	158.868	113.288
