# Supplementary material for: Metabolic response of Scapharca subcrenata to heat stress using GC/MS-based metabolomics
Source: PeerJ. 2020 Jan 28;8:e8445. doi: 10.7717/peerj.8445 (PMC6993748; doi:10.7717/peerj.8445)
Supplement: Supplemental Information 8 [file peerj-08-8445-s008.xlsx]

## Sheet: Sheet1 
Peak	Mass	RT(min)	S-0-1	S-0-2	S-0-3	S-0-4	S-0-5	S-0-6	S-2-1	S-2-2	S-2-3	S-2-4	S-2-5	S-2-6	S-24-1	S-24-2	S-24-3	S-24-4	S-24-5	S-24-6
N-Methyl-DL-alanine	130	4.94964	5.09043	11.3914	6.99456	12.5361	14.4274	13.0542	7.90424	12.5935	17.388	12.6872	14.8797	8.75512	14.3429	14.7572	13.4091	8.61162	11.7844	17.5455
threo-beta-hyrdoxyaspartate	220	4.95964	0.501818	0.415617	0.576127	0.543963	0.621403	0.485477	0.57673	0.508428	0.663572	0.550247	0.56041	0.483767	0.530661	0.57709	0.603574	0.506313	0.541571	0.362796
Mevalonic acid lactone	115	4.98435	1.82289	1.57877	2.6727	2.13589	2.06019	2.1873	2.40383	2.45921	3.03974	2.71862	2.42965	2.40312	2.33889	3.4368	3.0955	3.12947	2.69076	2.53838
Dithioerythritol	221	5.01354	22.0471	18.9118	35.5978	28.202	31.9422	25.5461	26.2187	29.9733	42.1426	34.3641	29.7846	27.1099	29.5373	36.1856	36.9903	39.4014	36.9443	24.4987
4-HYDROXYPYRIDINE	152	5.05154	0.780165	0.697116	1.86239	0.963723	0.684235	0.772081	1.1382	0.861291	0.881485	0.689158	0.90905	0.823492	1.12677	0.830599	0.90688	1.50478	0.909878	0.864517
glutamine	155	5.08449	14.5756	13.2217	20.4365	17.4652	15.3118	20.8013	16.6956	15.4645	17.7401	16.9583	15.6206	18.4034	15.7684	20.1149	17.6135	19.0614	21.0611	24.6092
2'-Deoxycytidine 5'-triphosphate degr prod	58	5.11909	954.518	812.744	1304.88	979.27	1053.14	1067.11	1144.49	1038.19	1387.66	1104.73	1139.09	1082.52	1238.86	1207.2	1288.92	1438.07	1390.63	1234.5
Acetylsalicylic Acid	197	5.1514	0.0795515	0	0.0907519	0.0902045	0.0834253	0	0.0753233	0.0599434	0	0.0863574	0.0646222	0	0.0591952	0	0	0	0	0
4-hydroxybutyrate	235	5.19471	0.0577501	0.0508507	0	0	0.0718692	0.0588659	0.0677169	0.0463784	0.0962127	0	0	0	0	0	0	0	0	0
p-benzoquinone	121	5.2437	22.2916	20.1241	31.6097	26.3034	30.6165	27.4658	28.616	27.7927	37.2401	34.8039	28.0498	28.8465	29.0148	32.5692	35.9241	36.7403	34.3999	32.5906
3-Hydroxynorvaline	172	5.28803	0.334724	0.310483	0.465542	0.408334	0.46219	0.364787	0.445224	0.379837	0.492738	0	0.478045	0.527699	0.490155	0.54514	0.586481	0.556727	0.504764	0.394163
1-Hydroxyanthraquinone	281	5.32077	0.735567	0.776791	1.05855	0.983107	1.06318	1.20384	1.27952	1.03414	1.32892	1.46322	1.10218	1.14448	1.06886	1.19579	1.23881	1.33061	1.29277	0.962726
dibenzofuran	168	5.34372	1.38776	1.31135	1.96422	1.65421	1.86245	1.76812	1.77357	1.73913	2.27299	2.12204	1.82496	1.69333	1.80739	1.97909	2.13937	2.10699	1.97687	1.89512
2'-deoxyadenosine	144	5.38073	0	0.0927874	0	0	0	0.12432	0	0.172261	0	0.123453	0	0	0	0	0	0.21447	0	0
Biphenyl	153	5.38937	1.12343	1.21296	1.68994	1.65218	2.00219	2.01927	2.4128	2.413	3.12135	3.22242	3.12783	3.06254	3.1577	3.58115	3.50849	3.78019	3.68743	2.91336
hydroxyurea	160	5.47127	0.49998	0.645384	0.908797	0.930029	0.835718	0.943223	0.875198	0.872695	1.22723	1.17646	0.802909	0.794609	0.729027	0.93609	0.923534	1.01655	0.91294	0.901446
leucine	158	5.48328	373.552	163.5	366.265	189.349	181.741	256.021	179.16	184.876	184.407	140.037	230.807	197.318	113.189	156.039	124.447	238.662	173.491	193.676
beta-Alanine	249	5.5933	270.024	261.891	269.187	358.997	387.485	199.804	385.887	203.144	314.894	326.78	275.622	341.377	171.572	298.138	328.573	316.647	334.142	308.629
creatine degr	262	5.62366	5.851	6.65937	5.81909	7.1722	7.48382	9.16068	8.30978	7.38408	10.9286	8.83498	9.77769	8.7382	10.6592	8.94054	10.0636	8.74696	7.23126	7.03026
beta-hydroxypyruvate	72	5.63472	8.48968	7.38611	9.70458	8.10613	9.32049	9.42762	9.7151	7.92865	11.8881	9.2661	9.11517	9.68388	11.3977	9.5685	10.1977	11.1058	9.8913	8.52437
2-ketobutyric acid	70	5.65366	8.00655	6.68299	10.9748	7.43583	8.81482	5.91368	7.75763	6.71729	8.52637	7.51718	5.56067	6.79552	5.23654	6.06917	7.38792	5.00226	7.57648	7.56752
3-Aminoisobutyric acid	102	5.69073	4.62679	4.85624	4.58365	10.2175	8.45532	4.49948	9.26401	4.2688	6.1554	4.97839	4.08142	5.80616	4.5028	5.66823	8.10025	3.40728	5.06739	7.79795
Nicotinoylglycine	207	5.73462	8.42053	8.61102	11.5845	10.6834	11.9736	11.5128	11.8796	11.3226	14.42	14.391	12.3347	12.109	12.404	14.005	14.7579	14.8127	14.1914	12.8863
2-hydroxypyridine	152	5.80451	23.5043	27.8975	28.1329	32.1115	32.4798	38.5652	36.5327	32.9024	44.2807	42.0273	39.5029	36.8479	40.8054	39.1305	40.5951	39.3885	33.4428	30.3368
Prostaglandin E2	225	5.81546	0.971067	1.03329	1.34811	1.2605	1.31284	1.52088	1.44349	1.42241	1.97085	1.75253	1.43201	1.40465	1.51355	1.5498	1.54965	1.82759	1.51127	1.36813
4-Hydroxycyclohexanecarboxylic acid	183	5.90927	0.079857	0	0.0850622	0	0	0	0	0.0655514	0	0	0.0962022	0.0913381	0.138632	0.0964726	0.117184	0.0799786	0	0.105052
Pyruvic acid	174	5.94419	1.18775	1.1331	1.46208	1.15392	1.29787	1.18679	1.53006	1.23002	1.34529	1.39178	2.18575	1.269	1.33569	1.91134	1.44577	1.94686	1.76924	2.33798
Maleimide	154	5.97222	0.162735	0.11267	0.252581	0.161838	0.16171	0	0.180766	0	0.193761	0.171692	0.175619	0.144115	0.188176	0.206532	0.197727	0.182262	0.19309	0.222783
5-Methoxytryptamine	174	6.06198	34.0278	32.4943	45.5498	34.6155	41.9401	40.64	40.2559	39.8223	59.1503	48.5565	42.8506	39.0126	45.4701	51.6361	49.672	47.3245	56.0219	60.0571
lactic acid	147	6.09916	5.47452	3.88909	4.75194	4.25395	6.20543	5.05695	5.57958	8.12456	7.12609	5.07202	5.4151	6.67397	6.58812	4.09242	4.65112	4.82348	4.54771	9.40521
scopoletin	249	6.12011	0.396731	0.320032	0.550553	0.401175	0.498562	0.410098	0.513306	0.464086	0.608953	0.539725	0.458603	0.469331	0.468551	0.548419	0.554333	0.567414	0.566747	0.474326
oxamic acid	190	6.16929	1.45836	1.35496	1.6807	1.46399	1.499	1.36426	1.31719	1.19799	1.69862	1.5199	1.05338	1.04926	0.939844	0.999256	1.01306	1.00082	1.02084	0.84894
Halostachine	178	6.19938	0.304911	0.284423	0.587	0.394847	0.399466	0.359464	0.397939	0.412302	0	0.423963	0.391761	0.347444	0.487553	0.495245	0.482909	0.476459	0.458933	0.429935
m-cresol	165	6.2235	3.46431	3.92551	4.80707	5.15208	6.66915	7.05445	6.52973	5.88584	7.65191	7.38364	7.43732	7.19133	5.46896	6.95997	2.53504	7.54036	7.04935	5.47761
epsilon-Caprolactam	170	6.24062	0.5482	0.743823	0.512615	0.299151	0.830702	0.434892	0.538992	0.326306	0.558752	0.649608	0.743794	0.922018	1.16632	0.799202	0.487949	0.281097	0.352878	0.661511
Hesperitin	209	6.27797	0	0	0.154947	0.166653	0.16265	0.119633	0.175787	0.154008	0.307687	0.23547	0	0.167759	0	0.18638	0.216376	0.188787	0.197378	0.125389
4-Hydroxymethyl-3-methoxyphenoxyacetic acid	225	6.29449	0.750003	0.798865	0.953511	0.988187	1.03865	1.11957	1.05692	1.03969	1.19528	1.25784	1.13226	1.05888	1.01264	1.22017	1.17047	1.30312	1.06618	0.875277
Benzoin	153	6.3476	0	0.199057	0	0.118466	0	0	0	0.0943456	0.209475	0.166569	0	0	0.78959	0.20422	0.203759	0	0	0.184462
glycolic acid	147	6.35486	10.7015	8.66162	11.4529	9.59167	10.6376	10.3591	10.0968	8.82781	12.0705	9.72043	9.98442	8.72681	8.26759	8.68271	8.96563	8.94126	8.89575	7.94361
Carbazole	167	6.46856	0.158917	0.185294	0.256209	0.287099	0.439986	0.370921	0.426662	0.452021	0.627439	0.673953	0.591482	0.643519	0.590246	0.709006	0.723422	0.877345	0.742317	0
Analyte	124	6.55803	0	0	0.0669683	0	0.0777457	0.101558	0.0935363	0	0	0	0	0.0957506	0	0	0	0	0	0
Citraconic acid deg	225	6.62471	0.0888764	0.124783	0	0.121991	0.110129	0	0.131598	0	0.173508	0.175629	0.147966	0.135076	0	0.145259	0	0	0.148121	0
Analyte 79	199	6.64278	0	0	0	0.0934385	0.0934436	0	0.0924324	0.0711123	0.134443	0.0951267	0.0805442	0	0.0947869	0	0	0	0	0
Maleamate	244	6.67092	24.8245	1.99994	23.2198	8.48029	11.9661	27.2729	31.3924	1.83836	13.5744	14.4779	18.1702	1.97589	29.9967	44.5075	32.4667	21.5837	16.1219	24.579
alanine	116	6.7973	827.25	1017.25	888.302	817.618	1080.69	823.513	935.476	851.484	853.811	824.263	766.754	703.268	742.232	743.233	705.013	537.645	726.125	762.226
Hippuric acid	105	6.8461	0	0	0.374764	0.254342	0	0	0	0	0.477048	0.276809	0.240508	0.367086	0.378611	0.399214	0.332517	0.547896	0.331334	0
Norleucine	86	6.94533	15.5586	11.514	24.5512	15.3332	16.8641	20.7646	15.911	16.4594	21.1201	18.9309	18.1227	19.159	13.0855	18.7891	18.7833	30.9563	19.0516	19.2855
hydroxylamine	249	6.99804	7.32713	6.68303	10.5294	8.12016	10.344	8.36747	9.79064	9.16605	11.624	11.2072	9.29323	9.54644	9.67753	10.5814	11.3968	11.8365	11.8573	10.3955
1-Methylhydantoin	116	7.0244	43.7799	42.4333	62.8182	52.2074	62.1688	54.8613	58.3719	56.8322	76.4921	74.7897	59.4453	64.3854	60.428	70.9713	80.5972	79.8468	75.8824	74.8846
N-formyl-L-methionine	248	7.1205	0.134341	0.12188	0	0	0	0	0	0.145663	0.203662	0	0.133314	0	0	0	0	0	0.21661	0
fumaric acid	245	7.12901	4.03	6.6697	4.39627	5.31724	7.174	6.53971	5.68912	8.13654	8.18599	4.87205	6.80233	6.19308	11.6775	6.16563	5.48212	4.41643	5.84528	7.30434
1,3-Cyclohexanedione	138	7.19632	1.68727	1.61304	2.4642	1.91906	1.92247	1.77226	1.79619	2.00492	2.38388	2.50031	1.55047	1.90875	1.67886	2.01475	1.85227	2.22249	2.3657	2.22145
benzyl alcohol	225	7.2961	1.0162	3.42285	0.9915	0.571498	1.48484	1.45837	1.25696	1.75743	1.69353	1.24534	2.38213	1.16864	4.66445	1.86849	1.54533	0.85155	0.668106	1.90379
Pipecolinic acid	156	7.33798	0.502228	0.392552	0.83822	2.27726	0.75434	0.538467	2.22384	0.461283	0	0.581998	0.411457	1.98702	2.6846	2.24599	0.649721	0.522035	0.746481	2.98094
sarcosine	116	7.34541	1.54457	3.02982	2.37273	2.6322	3.49052	3.79301	2.24973	2.87509	3.47488	4.65259	3.53216	2.35957	2.80378	2.63654	2.87068	2.59342	3.04713	2.43704
3-Hydroxypyridine	152	7.38024	21.9748	27.3264	19.6414	33.0919	39.2954	38.4938	34.6216	36.6984	41.6985	34.3742	29.4038	31.3155	24.9389	29.1976	25.6485	20.6738	30.4931	13.142
Aminooxyacetic acid	220	7.40295	25.2459	22.7733	32.6845	29.3757	29.1291	29.1405	30.9862	30.396	41.5637	36.4518	27.2073	27.9019	25.9034	29.3634	31.7926	31.8981	28.8546	28.2533
O-acetylserine	102	7.49697	1.64182	1.23994	2.58397	1.81869	2.28735	1.74479	2.04562	1.86557	2.46671	2.08564	1.49817	2.00156	1.6078	1.91734	2.23415	2.40419	2.50685	2.21942
3-hydroxybutyric acid	147	7.72042	1.20479	2.48322	0.27682	0.907661	1.59338	0	1.07702	1.64928	1.16228	1.51829	1.50378	0	0	0.305813	0	0	0	0
6-Aminopenicillanic acid	58	7.73184	3.75028	2.24637	2.37036	2.93497	5.84291	1.99072	2.86222	1.87124	1.65913	2.93552	2.36567	2.78387	4.16388	5.54622	3.17401	2.42169	2.06045	3.03623
O-Succinylhomoserine	128	7.80421	2.87236	2.29168	1.95194	1.96916	1.59862	2.81735	1.49855	1.72847	2.00314	1.76453	3.03122	2.35098	2.2569	1.96937	1.59323	2.11456	1.64945	1.15606
Gallic acid	281	7.83068	7.25223	7.17068	9.4057	8.04657	8.66327	9.22234	8.44634	9.03634	10.5408	9.95929	9.27331	8.4872	10.9949	10.7683	10.0523	9.59479	9.97921	9.64419
Citraconic acid	84	7.85939	41.178	45.4322	64.1201	49.5276	51.7983	54.9848	46.3417	44.6466	62.7758	55.8477	56.4477	51.3098	51.0393	53.5892	58.9789	75.3523	75.3379	61.9419
Pelargonic acid	215	7.94092	0	0.14439	0	0	0.123001	0.174909	0.132274	0	0.174842	0	0.136088	0	0.235924	0	0.188512	0	0	0.284946
2-Amino-3-methyl-1-butanol	202	7.94894	0.136038	0.132335	0.189672	0.188371	0.175263	0.215448	0.17874	0.193455	0.254472	0.232592	0.188416	0.184224	0.223879	0.228087	0.22544	0.224747	0.232717	0.24725
hydrocinnamic acid	104	7.96294	0.567423	0.469017	0.80484	0.563914	0.750428	0.625352	0.605189	0.635812	0.770992	0.784304	0.707507	0.713458	0.664568	0.796474	0.824407	0.834249	0.805469	0.791954
Methyl Phosphate	241	7.9826	5.63169	4.62011	8.58705	5.42263	4.40232	4.5683	6.83055	3.58479	3.6197	4.92613	7.43889	3.78913	6.44882	2.94746	4.08044	3.30322	2.65307	5.8429
N-Methyl-L-glutamic acid	98	8.03625	0.875307	1.13169	1.26383	1.00037	1.15595	1.57618	0.977984	1.18688	1.75234	1.12012	1.10378	1.14661	1.60789	1.80664	1.28252	1.38508	1.45185	1.29606
Mono(2-ethylhexyl)phthalate	225	8.05579	0.12324	0.101697	0.150863	0.113307	0.13426	0.144625	0.126481	0.133479	0.184674	0.170185	0.13243	0.160037	0.121718	0.149125	0.159797	0.1492	0.183648	0.190921
alpha-Tocopherol	237	8.10627	11.6921	7.16482	9.97546	8.67917	5.74295	9.65566	9.59109	14.5899	9.41374	14.3966	14.2334	16.5906	7.82696	11.8521	12.3907	13.3868	16.3581	12.4177
2-Deoxyuridine	70	8.11759	0	6.83853	16.9668	10.1197	0	9.29136	0	0	13.1936	13.5672	10.7581	0	9.87117	10.764	13.3361	31.7083	15.0515	0
4-nitrocatechol	285	8.17788	0.06082	0.0560665	0	0.0548339	0	0	0.080297	0.0637456	0.108918	0	0.0726309	0	0.0639627	0.0804357	0	0.0980685	0.096278	0.0755313
Analyte 138	171	8.23555	0.302461	0.183501	0.446721	0	0.382824	0.328536	0.416939	0.358724	0.496082	0.480923	0.394467	0.410196	0.418374	0.532381	0.563921	0.474539	0.569212	0.535666
3-hydroxypyruvate	114	8.24665	1.48891	1.81076	1.50907	1.55319	1.61418	2.38337	1.55844	1.27274	2.07651	1.94245	1.46594	1.76971	1.81632	1.8967	1.62708	1.82693	1.58784	1.34593
Methylmalonic acid	58	8.38926	0.500574	0	0.684258	0.923715	0.799226	0.754054	0.672242	0.716887	0	0.752442	0.821633	0.939417	1.29697	0.801162	0.939045	0.789651	0.821549	0.954615
guaiacol	166	8.4315	0.393468	0.273184	0.160806	0.229079	0.164779	0.203228	0.224502	0.22637	0.255778	0.160496	0.282614	0.199583	0.176111	0.13993	0.143659	0.138394	0.175323	0.0819499
N-epsilon-Acetyl-L-lysine	58	8.46304	2.43246	3.88995	4.05036	3.27845	3.15904	5.84682	4.49796	4.48169	5.66696	6.65169	4.71146	4.31241	5.5005	5.88171	5.50907	4.94984	5.43665	3.21178
Acetol	219	8.47592	0	0	0	0	0	0.143279	0	0.129627	0	0	0.128965	0	0.0992345	0	0.150603	0.16345	0.126014	0
2,2-Dimethylsuccinic Acid	231	8.52576	1.16583	5.7637	3.35091	1.74587	3.54363	5.64468	4.19331	3.12791	6.19428	1.58174	2.95543	4.05772	10.4328	4.89958	4.31577	2.33119	1.51721	13.1598
2'-Hydroxyacetophenone	200	8.60136	0.148645	0	0	0.130729	0.0854891	0	0.15504	0.117891	0.074536	0	0	0	0.0190929	0	0	0	0	0
butyraldehyde	212	8.63225	0.0400701	0.0393914	0	0	0.033686	0	0	0	0.0679103	0	0	0	0	0.038333	0	0	0	0
valine	144	8.64225	229.473	131.097	234.543	150	147.698	173.29	136.359	138.323	164.577	117.77	142.971	149.874	87.2949	162.263	119.628	112.576	169.342	134.4
N-Acetyl-L-leucine	186	8.68388	0.143495	0.1293	0	0.238689	0.129386	0.236536	0.175864	0	0.165371	0.102911	0.0910307	0.111253	0.149556	0.296622	0.135949	0	0.0735723	0
Carnitine	117	8.69485	10.2004	12.1799	6.10136	19.2696	10.9648	18.8833	15.9219	9.33041	11.5877	8.36304	7.15197	9.09059	11.8352	26.4449	9.5743	4.82696	6.37783	5.05152
1-Aminocyclopropanecarboxylic acid	202	8.75022	0.173285	0.758447	0.30366	1.18331	0.866072	1.23873	1.39818	0.759275	0.802907	1.05986	1.11023	0.71786	0.685591	1.08862	0.980424	1.10301	0.807015	0
Analyte 168	197	8.83466	0.0418533	0	0.0521677	0.0497787	0	0	0.0555668	0	0.0790043	0	0	0.0532277	0.0595173	0	0	0	0	0
Glucose-1-phosphate	217	8.87164	15.2487	20.6021	10.64	11.2321	11.0498	27.3122	15.7298	10.5759	13.1243	4.3281	12.1471	12.5902	20.8383	29.6076	27.4965	15.0053	14.8376	22.7875
2-methylfumarate	184	8.94164	0	0.0792937	0.06482	0.077045	0.10125	0.0613636	0.0840089	0.0648944	0.123371	0.12706	0.0584448	0.0815507	0.1261	0	0.101339	0	0.109418	0
Carbobenzyloxy-L-leucine deg	186	9.00103	0.439504	0.337035	0.327738	0.27147	0.330108	0.472771	0.498813	0.454717	0.616164	0.341829	0.567205	0.430221	0.60277	0.404231	0.371091	0.460803	0.464526	0.18556
glutathione	213	9.03899	1.25008	2.00134	0.300057	0.0804738	1.91937	0.461977	0.636654	0.636848	0.479103	0.187298	0.0836921	0.432189	0.693718	1.00402	0	0.547867	0	0
2-Deoxyerythritol	210	9.09681	0.0724189	0.139374	0	0.163533	0.132721	0.325268	0.202974	0.224065	0.235964	0.268984	0.319659	0.182062	0.227234	0.418305	0.325958	0.220336	0.223847	0.173051
4-Vinylphenol dimer	192	9.17793	0.439564	0.36489	0	0.459932	0.552852	0.520379	0.492349	0.540892	0.679347	0.62326	0.51149	0.521163	0.556244	0.565679	0.650112	0.567191	0.59132	0.585161
benzoic acid	179	9.20425	3.32121	3.20391	4.73379	4.06652	4.4755	4.27072	4.30199	4.15025	5.27495	5.12458	4.19299	4.25693	4.2156	4.61174	4.90962	5.15402	4.80316	4.60264
Cumic Acid	147	9.24402	7.85173	3.29306	4.37441	2.40789	2.17207	6.07544	3.86588	5.53473	2.77935	2.83768	1.32458	2.19227	6.62277	2.13923	2.04494	3.20136	2.34247	1.25118
N-Acetyl-5-hydroxytryptamine	138	9.44582	0.226637	0.362998	0.312731	0.344478	0.383551	0.438189	0.296398	0.275956	0.410515	0.359118	0.285101	0.344168	0.371239	0.354583	0.45018	0.420082	0.370906	0.264302
Ethanolamine	216	9.46265	0.877119	0.932424	0.744595	1.08987	0.951876	0.743217	1.15168	0.714841	1.09924	0.979887	0.992893	0.996743	0.739597	0.942803	1.04842	0.880759	0.831049	0.894221
phosphate	300	9.53725	179.822	180.755	137.986	147.765	182.528	227.737	171.923	151.885	179.211	134.601	172.572	146.395	247.54	129.268	134.102	133.638	171.961	104.14
glycerol	205	9.57197	46.9081	40.2616	46.2021	47.509	54.7775	46.9703	47.2427	43.8815	54.2251	41.5325	41.4945	50.0874	39.0759	35.1098	40.4824	39.9289	40.342	37.8819
2,4-diaminobutyric acid	197	9.59227	0.122173	0	0	0	0.168612	0.144277	0	0.156029	0	0	0	0	0	0	0	0	0	0
nicotinic acid	180	9.60736	10.4732	13.5887	9.0168	11.1647	14.3423	17.3465	15.0835	13.6671	15.048	14.5874	15.4484	13.9479	9.14051	11.1116	9.61726	11.6713	12.1095	7.87152
2,6-Diaminopimelic acid	200	9.67532	0	0	0.639454	4.22419	0.457169	0.30679	0.191269	0.599458	0.568988	0	0	3.24724	0.436975	3.43695	0.107485	0	0	0
5-Hydroxyindole-2-carboxylic acid	231	9.7953	0.405408	0.378725	0.288647	0.318322	0.326029	0.417656	0.365312	0.331541	0.437838	0.280342	0.337463	0.322457	0.321618	0.249172	0.34647	0.308669	0.23834	0.232044
Analyte 208	183	9.81096	0	0.0966592	0	0	0	0.093815	0.107717	0.136943	0	0	0.13996	0.0935998	0.080718	0.0770056	0.144028	0.0865699	0	0.0886428
Isoleucine	158	9.87909	181.181	76.8219	161.984	83.2982	58.7305	108.043	70.837	69.3278	74.2992	58.2874	95.1677	79.938	46.6998	73.3499	47.3551	64.2389	80.4197	80.0186
L-Allothreonine	117	9.88823	1.64332	1.02988	0	1.46011	1.0536	0	0	0	2.7835	1.87315	0	0	1.45963	2.36618	2.221	1.04421	1.73753	1.42659
proline	142	9.95157	197.693	105.56	190.539	92.5924	108.068	111.669	117.828	104.393	79.7385	78.2602	122.028	103.3	68.5009	77.4226	56.2252	163.462	109.15	122.897
trans-4-hydroxy-L-proline	58	9.99876	0	0.751286	1.659	0.517026	0.59979	1.38014	0	0	0	0	0	2.1247	0.796585	1.21534	0	1.05612	1.09753	0
N-Ethylglycine	156	10.0326	0.341281	0.225676	0.511379	0.26366	0.432485	0.231961	0.390845	0	0.140601	0.60739	0.340881	0.57074	0.452137	0.409905	0.401071	0.207027	0.424065	0.506777
maleic acid	245	10.0416	0	0	0	0.253477	0.225996	0.233048	0	0.265036	0	0	0	0	0.282985	0	0	0	0	0
glycine	174	10.082	196.284	187.512	232.668	141.291	277.252	209.765	207.352	209.26	195.026	270.111	355.106	194.25	232.392	192.19	190.389	180.383	326.751	154.676
4-hydroxy-3-methoxycinnamaldehyde	254	10.0903	0	0	0	0.0703364	0	0.184452	0	0	0.125912	0	0.171294	0.106984	0	0	0.111115	0.0943124	0	0
pyrogallol	239	10.1132	1.1628	0.941267	0.64274	0.687879	1.14797	1.38381	1.19645	0.860312	1.21556	1.12663	1.6212	1.10802	1.08641	1.00426	1.0092	0.913421	1.07381	0.72797
succinic acid	147	10.2158	115.126	285.353	117.23	226.78	277.614	111.696	140.989	190.557	137.046	241.572	111.457	301.853	275.463	322.179	136.419	72.243	126.549	244.526
arbutin	254	10.2394	0.114198	0	0	0	0	0.143975	0.148825	0	0.252298	0	0	0	0.216185	0	0.243568	0.258971	0	0
urocanic acid	195	10.3271	3.50657	5.30606	2.85012	3.49988	3.3127	4.07081	3.7007	3.10393	3.92595	2.70603	3.80086	3.23233	7.15517	3.96718	4.01498	3.35047	2.60973	3.0871
picolinic acid	180	10.35	7.66295	7.74552	8.86516	8.95057	6.63464	19.2763	10.1552	8.53726	14.0252	9.57494	11.4612	12.9753	13.0211	12.9825	10.1138	14.4255	12.6382	11.0354
oxalic acid	147	10.3805	2.85586	3.87075	0.860452	1.12538	1.53732	2.79549	1.23245	3.60685	1.57411	1.04126	2.38947	2.86043	12.2159	6.61574	11.9959	4.26307	4.72379	15.2753
D-Glyceric acid	189	10.424	1.01081	0.929032	0.842106	1.15829	1.07629	1.12419	0.944864	1.0644	0.99603	1.2293	1.11546	1.01225	0.94839	0.891587	1.08499	0.851694	0.953386	0.85823
5-Dihydrocortisol	178	10.5284	0	0.166096	0.0977286	0.124551	0.137531	0	0	0	0	0	0.184702	0.134909	0.12156	0.0972917	0.0973166	0.0996563	0	0.0780737
uracil	241	10.5472	41.3816	48.1466	44.6201	37.7896	57.3137	96.2507	56.6747	56.4195	53.1224	52.76	61.1367	51.332	51.4154	50.6361	57.5456	45.1854	49.3581	41.8112
Itaconic acid	215	10.6192	0.152511	0.222867	0.0449911	0.0782781	0.18476	0.195462	0.142169	0.360763	0.107824	0.147343	0.219547	0.093752	0.139295	0.216566	0.2733	0.12842	0.131347	0.150376
Pyrrole-2-Carboxylic Acid	265	10.6513	0.108384	0.0941638	0.124914	0.118116	0.131775	0.131604	0.131075	0.125652	0.170231	0.138609	0.117237	0.10761	0	0.10946	0.143458	0.147851	0.131926	0.119038
Analyte 2	300	10.6573	0	0	0	0.251675	0.183333	0	0.259761	0	0.313399	0	0	0.288498	0	0.264864	0	0	0	0
3-aminopropionitrile	239	10.7055	15.3739	14.2899	22.446	18.0122	20.9863	19.3653	20.0727	19.6656	26.8633	24.1811	18.8387	19.8354	20.0821	22.2851	25.0894	25.3888	23.4765	22.5416
Ethyl cinnamate	101	10.7172	0	0.359412	0.351201	0	0.554032	0.564409	0	0.423445	0.554444	0.36938	0.468567	0.446499	0.845948	0.37582	0	0	0	0.448229
N-acetyl-L-aspartic acid	58	10.8235	7.68088	9.8088	6.22519	16.9203	9.91274	14.2513	13.9778	8.1712	10.5235	8.52693	7.01052	8.49967	11.6128	25.5191	11.5252	6.83156	7.19975	6.45528
serine	204	10.8786	203.584	134.89	245.656	113.502	118.608	175.796	170.699	119.878	98.1619	110.985	160.84	128.169	151.974	140.347	68.6934	226.499	112.632	269.839
norvaline	156	10.9499	1.76622	2.6495	0.473569	0.433953	0.497729	3.47049	0.647842	0.549845	0.646024	0.196225	1.76653	0.374206	0.3665	0.722688	0	0.177605	0.429607	1.22314
thymine	269	10.9645	1.1026	0.820404	1.08252	1.56806	1.50888	1.5983	1.68074	1.18466	1.87576	1.45771	1.6898	1.3003	1.76577	1.3464	1.50386	1.91056	1.87816	2.36583
3-Cyanoalanine	141	11.0406	2.46367	1.67064	4.37237	2.13563	1.46054	1.67805	1.2575	1.23732	1.1888	1.53122	1.3127	1.45072	1.19942	1.31235	1.18626	1.48092	1.52274	2.27706
quinolinic acid	194	11.0811	0.248471	0.291704	0.443666	0.419911	0.473685	0.577861	0.569623	0.624271	0.757842	0.752342	0.671733	0.708849	0.759037	0.987636	0.88822	1.02751	0.890939	0.84062
carbamoyl-aspartic acid	160	11.1155	0.827677	1.02616	1.09201	0.91043	1.24252	1.33451	0.954328	1.04896	1.32677	0.980086	0.995858	0.97209	1.80627	1.21018	1.55482	1.25831	1.07278	0.973879
1,3-diaminopropane	172	11.1827	0.243049	0.273275	0.392296	0	0.802823	0.371725	0.449791	0	0.494713	0.528857	0.536941	0.297809	0.481547	0.700573	0.470657	0.325463	0.401772	0.230388
threonine	219	11.2414	53.5857	44.5403	60.4974	50.6455	43.2823	69.9158	32.9156	43.9607	65.2236	42.7982	40.3082	46.4382	36.0025	86.6738	27.3373	36.3629	39.6412	43.6522
Phytol	143	11.3009	0.235053	1.04936	0	0.863128	0.512398	0	0.281677	0.832801	0.836153	0.342411	0.373458	0.180089	0	0.517903	0.344362	0	0.192344	0
phloroglucinol	180	11.472	0.466861	0.376059	0.619516	0.591571	0.663319	0.73347	0.608167	0.458559	0.574329	1.54776	0.999309	1.22281	1.00479	1.15114	1.1781	1.27395	1.14826	1.98728
Glutaric Acid	147	11.552	2.23044	1.67474	1.86649	1.72217	1.93381	1.54556	1.03666	1.22727	1.04763	0.917825	1.19827	0.749323	0.451817	0	0.480291	0.5316	0.476489	0.406643
D-alanyl-D-alanine	188	11.5865	687.189	1400.76	1121.76	1022.94	1199.96	1074.09	1377.35	1674.71	876.058	1091.15	1108.18	1721.46	978.807	1688.67	1462.29	1309	801.356	924.343
MALONAMIDE	172	11.6901	0.306908	0.344749	0	0.222139	0.392644	0	0	0	0.365527	0	0.382344	0.301379	0	0.332261	0.318454	0.276285	0	0
2-Hydroxybiphenyl	227	11.7728	18.7442	19.6918	14.8466	18.8157	20.7054	27.0352	18.7805	14.2346	20.9848	13.6532	20.4578	16.4135	20.4929	14.9097	21.679	17.5462	9.33657	11.1408
phosphomycin	72	11.8545	0	4.77078	0	0	0	6.83752	0	0	7.27849	0	6.6794	7.85839	3.288	6.83515	0	0	0	0
glycocyamine	183	12.0024	0	0.0890216	0	0	0	0	0	0	0	0.133393	0	0	0	0.0910972	0	0.115944	0	0.133059
3,5-Dihydroxyphenylglycine	237	12.0175	0.363962	0.217468	0.57025	0.304484	0.250788	0.313753	0.30621	0.29085	0.352416	0.306662	0.253221	0.718853	0	0.489633	0.500183	0.588548	0.547574	0.49579
cytidine-monophosphate	243	12.0293	1.77256	1.69742	2.37568	2.3829	2.10181	2.67172	2.51462	2.17919	2.80486	2.08406	2.797	2.62793	3.10461	2.38819	2.64177	3.19304	2.35954	2.49093
L-4-Hydroxyphenylglycine	194	12.0488	1.50069	4.90146	2.72769	5.46508	5.21744	9.16567	8.73616	7.51505	5.74645	7.90997	8.39852	6.03164	3.67618	7.53751	5.89829	9.09409	6.41104	0.726654
2-amino-2-methylpropane-1,3-diol	218	12.1524	1.77954	1.35095	1.92723	0.824983	1.30376	1.59512	0.612585	2.21186	0.748526	0.356962	1.84981	0.667171	2.2314	1.75003	0.854859	0.85268	1.61275	1.99647
Erythrose	262	12.1902	1.13253	1.08813	1.3414	1.26957	1.27563	1.38846	1.37392	1.61472	1.97182	1.86454	1.68817	1.33732	1.30185	1.73521	1.78421	1.82027	1.75717	1.4405
Bis(2-hydroxypropyl)amine	232	12.2274	9.155	6.92074	3.72494	0	10.4808	6.89969	7.9124	5.8344	4.47486	5.7867	0	6.75634	0	27.6228	13.2681	6.88745	0	0
4-aminobutyric acid	254	12.2374	63.5368	90.2923	44.6518	48.7492	55.1493	79.3671	60.965	54.0364	59.0585	43.8793	124.928	70.7575	128.208	102.501	66.232	63.9908	59.7721	50.3673
asparagine	243	12.2499	94.3481	81.8576	108.445	54.4663	105.49	53.4049	57.5139	64.0192	49.9069	57.5143	96.3387	87.8966	152.003	94.6085	106.968	64.9888	75.1451	97.2214
2-aminoethanethiol	237	12.296	0.307799	0.295411	0.363304	0.370931	0.289327	0.37701	0.420653	0.324872	0	0.39131	0.392554	0.235311	0.41817	0.406636	0.492096	0.497716	0	0.448361
O-phosphonothreonine	71	12.3727	24.6939	15.7641	16.7767	14.6582	12.956	18.0367	19.878	12.2268	15.985	11.1582	20.8852	16.3045	12.0137	9.44273	6.50802	14.3843	11.5728	6.64413
oxoproline	156	12.3874	0.502013	2.82451	0.633498	0.534053	0.650202	2.53207	0.486429	1.88978	0.471759	0.521412	0.485214	0.465762	0.60085	0.526016	2.6633	0.515194	0.534203	0.526554
Aminomalonic acid	218	12.401	3.45164	3.25622	4.09365	2.55545	4.14644	6.81445	4.1409	3.45648	3.91756	4.684	5.7448	3.39726	3.97412	2.90588	3.49338	5.42732	4.45185	3.37951
4-methylumbelliferone	233	12.4762	1.16954	1.00687	0.89077	0.969316	1.29931	1.2184	1.21519	1.40816	1.80738	1.2449	1.46273	1.15542	0	1.32888	1.09835	0	0.750313	0
Melatonin	186	12.4911	0	0.223883	0	0.26568	0	0.344665	0.458926	0.233223	0.341918	0.467458	0	0	0.266587	0.349277	0.347963	0	0	0.400004
2,3-Dimethylsuccinic acid	200	12.6106	0.378088	0.793953	0	0.0897784	0.224105	0.208508	0.0757006	0.258075	0.0879745	0	0.160456	0.242004	0.754329	0.49805	0.449437	0.486994	0.40177	0.510394
4-aminobenzoic acid	58	12.6326	0	0	0	0	0	4.60244	0	5.97973	6.06576	0	4.98785	4.81012	0	6.08341	0	4.6632	0	0
L-Malic acid	245	12.6539	15.8512	35.0526	14.9404	29.8267	23.7276	22.6688	25.3456	33.8305	24.7843	22.8067	19.1525	23.5731	33.8319	22.0288	19.2164	9.62121	18.565	21.8859
thymidine	155	12.6931	2.39112	2.56952	0	2.5429	1.36615	0.850618	2.62422	2.77034	2.35511	2.04851	1.55092	0	1.23839	0	0.166814	0	0.181086	0
2-Hydroxyquinoline	216	12.8478	0.508711	0.690379	0.443351	0.257783	0.599292	0.257877	0.349085	0.53155	0.270557	0.229341	0.193557	0.22045	0.277766	0.34346	0.198195	0	0.227795	0.266353
Quinoline-4-carboxylic acid	184	12.8905	0	0.0557476	0	0.0898176	0	0.0630741	0.0579931	0.0537193	0.0313245	0	0.0238522	0.068152	0.0684729	0	0	0	0	0.113039
adipic acid	111	12.9093	1.24519	1.02717	1.22975	1.00618	0.972167	0.925121	0.876102	0.759349	0.870481	0.70037	0.666428	0.723167	0.423274	0.294207	0.467588	0.427493	0.426273	0
thymidine 5'-monophosphate degr prod	155	12.9538	5.49512	5.70017	0.263489	5.21527	2.82314	1.9458	5.76577	5.95488	4.97857	4.37426	2.8808	0.341648	2.28875	0.365515	0.253818	0.819746	0.322517	0.854583
putrescine	174	12.9771	49.5883	56.8098	57.3494	59.3716	39.8716	61.9009	62.2352	76.8991	60.2471	46.8438	49.59	54.3561	54.672	73.127	48.1031	50.4557	63.2783	64.6503
Analyte 3	72	13.0897	0	0	5.43623	5.45606	0	0	4.27585	0	0	5.88211	0	8.20525	5.83341	0	0	0	0	0
aspartic acid	156	13.1062	830.233	886.345	1010.07	874.468	1078.92	1015.86	686.244	678.404	783.914	809.003	689.138	764.517	950.264	830.34	905.325	763.281	870.626	926.006
Cytosin	254	13.1305	4.54615	6.24552	6.61483	6.13789	8.90574	11.3446	9.71452	13.8493	9.47459	10.6524	11.3576	9.91457	7.16204	8.34496	8.54825	10.3546	7.10574	4.21101
3-hydroxy-L-proline	230	13.2074	1.43095	1.94829	4.4246	4.60173	0	1.32427	1.63643	2.17848	6.58227	1.66764	1.78682	1.57766	4.70609	12.9213	2.51153	2.43515	1.20849	1.10868
5,6-dihydrouracil	314	13.2399	0.463537	0.542435	0.279467	0.37788	0.673577	0.506829	0.825533	0.437464	0.808645	0.56989	0.664364	0.428151	1.11422	0.767381	0.624551	0.536857	0.319003	1.67754
N-2-Fluorenylacetamide	188	13.2557	0.471143	0.598504	0.7413	0.747455	1.09208	0.871111	0.67243	0.848666	0.870421	1.0021	0.890324	0.58706	0.563115	0.882393	0.958821	1.40223	1.17143	0.545909
2-Amino-3-methoxybenzoic acid	58	13.2688	1.41212	0.956103	0.443577	0.662355	0	0	1.15999	0.848024	0	1.66294	0	0.635432	0.849889	1.06137	0	0	0	0
6-hydroxy caproic acid	237	13.4112	0.0238529	0	0	0	0	0	0	0.00759196	0.0132727	0.000104139	0	0	0.0115485	0	0.00355706	0	0	0.002372
3-Hydroxypropionic acid	145	13.4144	3.4096	7.78727	5.6648	10.4317	7.96736	5.8957	10.6972	8.04642	5.48485	7.93063	7.18894	5.74371	1.7456	8.67331	0	6.54119	5.89959	1.51992
creatine	314	13.5027	0.0919965	1.0089	0.11912	0.478238	0.139188	1.26392	0.680424	0.284149	3.74102	0.0676057	0.0860052	0.581601	0.132036	0	0	0.215397	0	0.44779
Threonic acid	205	13.5535	1.40582	1.37322	0.728578	0.857423	1.32163	1.9069	0.962088	1.2534	1.37909	1.64544	2.17563	1.23986	0.89442	1.3913	1.30463	0.7549	1.12916	1.07283
2,3-Dihydroxypyridine	241	13.5774	0.319785	0.354442	0.331724	0.355648	0.413545	0.574813	0.502403	0.392783	0.601218	0.566103	0.65717	0.570187	0.797422	0.589238	0.685303	0.521204	0.519731	0.493283
tartaric acid	269	13.6102	0.280586	0.214616	0.287941	0.281887	0.3122	0.261506	0.295744	0.279446	0.347276	0.3052	0.29977	0.0424907	0.122555	0.110954	0.0955142	0.0524544	0.0118667	0.174849
Indolelactate	202	13.6423	2.70363	2.15596	4.99019	3.21028	1.66875	1.62313	1.45748	2.25949	3.80431	1.75427	1.88631	1.46104	1.83272	1.43625	2.17444	2.11872	2.11047	2.23768
cyclohexylamine	200	13.6847	0.272257	0.284378	0.505418	0.454061	0.284464	0.963429	0.696003	0.72042	0.303546	0.295873	0.814472	0.558446	0.264563	0.631167	0.295754	1.05114	0.464906	0.194805
N-Carbamylglutamate	114	13.7524	0.733142	0.603618	0.672382	0.60132	0.279595	0.878059	0.555966	0.499309	0	0.400024	0.622936	0.60737	0.597828	0.732218	0	0.43065	0.712275	0.461977
3,6-Anhydro-D-galactose	129	13.7675	1.98742	1.8277	1.79514	2.26056	1.87042	3.55734	2.85218	2.17343	2.60612	1.25536	2.65044	2.24926	2.7546	1.61201	1.34233	1.03091	1.44112	2.65631
(2R)-2-amino-3-phosphonopropanoic acid	237	14.0006	1.10742	0.534635	1.54158	1.02962	0.700467	0.862825	0.857765	1.13017	0.57927	0.916294	0.875126	1.33419	0.938583	1.15803	0.931512	1.30009	2.34485	1.67102
1,2,4-Benzenetriol	239	14.0806	0.73072	0	0	0.86524	0.859731	0	0.982855	0	1.32428	1.08702	1.14551	0	0.76817	0	1.07978	0	0	0
iminodiacetic acid	234	14.1192	1.0918	0	0	2.03321	2.22589	4.67309	4.62375	2.89072	2.21735	2.37058	4.67748	0	2.33518	3.42785	1.97994	3.10859	2.00659	0
pimelic acid	125	14.1293	1.04108	0	0.994483	0.827049	0.86353	0.731756	0	0.708062	0	0.481196	0.542503	0.54446	0	0	0.323183	0.313872	0	0
ascorbate	230	14.2048	0.0953218	0.104856	0	0.188009	0	0.185811	0.220657	0.29429	0.301085	0	0.319803	0	0.184535	0	0.118401	0.176326	0.213857	0
ornithine	142	14.2572	238.016	242.479	252.008	160.227	342.411	189.601	204.528	191.139	165.584	175.439	355.267	285.024	508.499	318.639	365.898	212.4	250.652	373.501
glutamic acid	230	14.3204	25.1197	28.5436	30.2291	24.4988	32.2831	29.4179	19.1754	19.8357	21.7214	23.2792	20.4951	21.3585	29.6712	24.1547	27.8895	21.3767	25.841	26.1884
phenylalanine	218	14.397	150.514	53.7139	242.411	106.548	52.0613	89.0514	64.4919	72.9673	72.5598	58.3172	89.3468	67.77	45.1653	60.4304	50.3415	76.623	93.8119	116.932
5-Dihydrocortisone	202	14.4066	0	0.347431	1.07056	0.623182	0.374838	0.119294	0.273919	0.208049	0.438638	0.345192	0.164554	0	0.140356	0.19985	0.268488	0.190059	0.0795887	0
cis-1,2-Dihydronaphthalene-1,2-diol	191	14.4517	0	1.1188	0	1.4788	1.31345	1.01264	1.29482	1.24967	1.55764	1.55871	1.26278	1.21121	0.745683	1.41518	1.42785	1.49655	1.31135	1.08692
3-(1-Pyrazolyl)-L-alanine	244	14.4786	0.24343	0.203369	0	0.108934	0.109128	0.224012	0.169923	0.0985745	0.181208	0.105567	0.275674	0.112193	0	0	0	0	0.125482	0
N-alpha-Acetyl-L-ornithine	200	14.5176	1.22102	1.11169	1.44384	0.713053	1.30421	0.70116	0.733973	0.889655	0.791454	0.943614	1.37887	1.11808	1.95412	1.29335	1.36694	1.10494	1.23095	1.25641
5-Hydroxyindole-3-acetic acid	71	14.533	0.557819	1.12578	0.831322	0	0.652287	0.804563	0.630824	0.8148	1.24668	0.750294	1.0855	0.420031	0.677411	3.50709	1.75216	1.07231	0.730656	0
Atrazine-2-hydroxy	257	14.5649	0	0.54569	0.601727	0.551485	0	0	0.504375	0	0.426928	0	0.550361	0.368771	0	0.3376	0	0	0	0
O-Phosphoserine	211	14.5861	0.906132	1.1455	0.928278	1.00538	1.46086	1.2907	1.38871	1.16865	1.17558	1.24134	1.52111	1.33173	1.3316	1.28833	1.65985	1.06726	1.87299	1.30374
L-dopa	218	14.7195	2.84333	3.73542	6.14168	2.79182	2.72554	1.56846	3.07567	3.15627	1.5185	1.06598	1.989	1.66702	5.8089	3.1194	2.92475	2.80802	0.464466	1.35965
Analyte 4	98	14.7795	0.286356	0.160294	0.139375	0.245376	0.104647	0.260648	0.187194	0.236315	0	0	0.34041	0.320272	0.34957	0.351076	0	0	0.269599	0.50351
4-oxo-1H-quinoline-2-carboxylic acid	216	14.8285	0.0805762	0.152853	0.324727	0.0284172	0.153086	0.046702	0.052448	0.120485	0.132226	0.0336725	0.0338982	0.103612	0.201173	0.20053	0.0747396	0.190327	0.0385486	0.0477075
taurine	188	14.897	125.985	126.987	127.01	132.059	148.647	155.124	169.512	146.948	178.822	164.892	224.779	169.902	176.255	210.116	195.204	219.245	205.42	154.192
L-Cysteic acid	282	14.9301	0.128878	0.325522	0.0778111	0.128866	0.394893	0.033556	0.104282	0.045939	0.118503	0.0545867	0.0621002	0.284086	0.62242	0.0912336	0	0.0620446	0.0690764	0
ribose	103	14.9517	0.789326	0	0	0	0	0	0	0	1.13045	0	0	0	0.600567	0.643516	0.530701	0	0	0.726411
5-Aminovaleric acid	174	15.1779	0.388378	0.677757	0	0.432241	0.616044	0.413389	0.590965	0	0	0.57373	0.446738	0.626649	0	0.589808	0.489589	0.47838	0	0
lipoic acid	282	15.1857	0.284361	0.257186	0.436242	0.429823	0.324508	0.603008	0.375595	0.384746	0.693607	0.568461	0.335105	0.400954	0	0.409375	0.477858	0.476131	0.375464	0.546503
Menthone	197	15.2005	1.64379	2.1794	1.47156	1.6894	2.08326	2.62109	2.49506	3.07498	3.67892	2.43853	3.318	2.68414	3.94482	2.9987	3.33465	3.424	2.32282	2.038
6-hydroxy caproic acid dimer	187	15.2577	2.20606	1.77418	2.10372	1.5643	1.60328	1.39937	1.35755	1.02551	1.13727	0.989664	0.837497	0.790512	0.615196	0.620139	0.656783	0.602591	0.545715	0.525667
2-hydroxybutanoic acid	253	15.2645	0.125763	0.169569	0.158776	0.167659	0.189722	0.145277	0.214963	0.149736	0.159595	0.193642	0.245912	0.156889	0.199473	0.183064	0.105777	0	0.262341	0.199533
quinic acid	239	15.2951	0.0334021	0	0	0.0393707	0	0	0	0	0	0.0574916	0	0	0	0	0	0.0840026	0	0
cycloleucine	57	15.3427	0.804518	0.963426	1.11122	0.818779	0	1.21786	1.08196	1.02964	0	1.00651	1.01465	0.939492	0.748036	1.22569	1.27158	0.976251	0.9964	1.0579
3-Hydroxyflavone	154	15.4136	1.63704	1.192	2.84983	2.35014	2.67702	2.65288	2.73854	2.51833	4.13278	4.87291	2.26125	2.9346	1.38969	2.84112	3.79055	4.07314	3.60441	2.78384
alpha-Aminoadipic acid	244	15.449	0.388648	0.401621	0.134615	0.137741	0.569788	0.219733	0.133026	0.446003	0.348109	0.343447	0.92799	0.285932	0.782309	0.285741	0.218868	0.206772	0.278202	0.541893
cyclohexylsulfamic acid	208	15.4583	0.499988	1.48098	1.18444	1.01016	1.73836	0.450852	0	0.457529	0	0.162498	0	0.330746	0	0	0.130736	0	0	0.22574
beta-Glycerophosphoric acid	243	15.5395	10.2323	11.5716	12.5088	10.9514	17.6639	15.2805	15.861	13.153	13.8551	14.7968	15.0149	13.9061	16.0754	15.7512	20.9925	13.7224	19.8041	16.0281
2-amino-3-(4-hydroxyphenyl)propanoic acid	230	15.7656	0.718044	2.54553	0.991763	2.70758	2.27377	4.87092	4.53214	3.71819	2.81752	3.49627	5.25575	2.85832	2.22307	4.29757	2.83075	4.85005	3.37644	0.41622
D-(glycerol 1-phosphate)	300	16.0183	12.1764	14.3688	12.6512	12.2836	18.313	14.7536	17.7209	16.2843	14.2854	16.5251	18.9572	14.8202	15.7282	15.1655	22.583	17.6204	20.2186	19.3765
tyrosine	218	16.1179	306.086	196.214	351.84	244.801	232.933	300.518	221.916	233.495	249.461	227.347	263.841	258.516	217.199	289.249	248.422	246.185	284.999	309.814
Galactonic acid	217	16.2531	1.05379	1.32211	0.427946	0.855954	0.709681	0.869163	0.901527	0.85677	0.579926	0.799234	1.07687	0.923235	1.05577	0.903371	0.910059	0.347062	0.689819	0.72714
O-Phosphorylethanolamine	188	16.3033	32.8227	34.7956	20.541	25.8889	34.3277	27.5911	46.3143	39.6774	46.1121	46.4581	62.9767	39.9286	42.8155	35.5371	48.9757	60.6431	70.9545	50.1033
methionine sulfoxide	128	16.348	0	0	0	0	0	1.64991	0	0	0	0	2.45281	1.81142	2.20695	1.34505	1.24759	1.34242	1.26391	1.29838
phytosphingosine	204	16.3631	3.22788	3.3159	0.773823	4.03353	1.54617	1.16214	3.13942	3.53903	3.06741	3.60601	2.3107	0.821842	4.8654	0.955371	1.09865	1.76957	0.665851	0.871431
Dodecanol	243	16.3861	0	0.312168	0	0	0	0.276053	0	0	0	0	0	0	0.329557	0	0	0	0	0.223492
6-Hydroxynicotinic acid	269	16.4228	0.0868684	0.083858	0	0.0735288	0	0	0	0	0	0	0	0	0	0	0	0	0	0
terephthalic acid	128	16.4543	0	0	0	0	0	0	0.846548	0	0	0	0.555301	0	0.633679	0.364214	0	0.475618	0	0.433727
Homogentisic acid	237	16.4613	0.11009	0.170997	0	0.135541	0.162419	0.256337	0.131373	0.162954	0.179852	0.220896	0.272614	0.171871	0	0.161695	0.217024	0	0.0850285	0
azelaic acid	201	16.5358	4.96005	3.92137	4.60707	3.68264	3.62392	3.27597	2.97677	2.0801	2.51043	2.23278	1.81317	1.67194	1.29193	1.30042	1.30649	1.39104	1.30152	1.05236
beta-Mannosylglycerate	204	16.6058	634.964	374.138	304.921	605.464	267.765	521.056	419.93	462.184	452.465	576.58	544.423	622.593	343.853	289.581	526.28	548.657	681.882	474.406
3-phosphoglycerate	227	16.618	0.203009	0.27275	0.172113	0.208891	0.418243	0.362002	0.3093	0.285109	0.277907	0.326622	0.176709	0.12719	0.386754	0.233764	0.297622	0.256002	0	0.196363
hypoxanthine	265	16.6517	35.0755	56.3028	16.7182	30.0068	54.6746	100.174	41.8395	49.1044	36.7926	25.1026	9.31046	32.828	18.3449	15.0379	9.05967	5.40112	16.6193	4.70439
cellobiose	269	16.7616	0.0415837	0	0	0	0.0559708	0	0.0471617	0	0	0	0.0617381	0	0.0876692	0	0	0	0	0
citric acid	183	16.7994	0.64691	0	0	0.636141	0.857781	0	0.709129	0.472781	0.835144	0.467531	0.478645	0.497877	0.692245	0	0.509951	0.62459	0.618448	0.924633
citrulline	157	16.9081	63.5538	59.608	62.4719	37.492	78.5977	35.4748	40.8034	44.0405	34.8074	40.2801	72.7855	64.4001	116.242	67.0165	82.6549	46.1726	53.9148	71.0952
1,5-Anhydroglucitol	231	16.9605	5.4832	6.43125	5.64585	6.89747	7.83376	8.53924	9.55715	9.68243	9.77376	8.68832	8.21988	8.73822	6.20069	9.29313	10.5421	7.01656	7.97029	5.00184
S-carboxymethylcysteine	235	17.018	0.0601602	0.0966195	0	0	0	0	0	0.123398	0	0	0	0	0	0.21036	0	0	0	0
3-Indoleacetonitrile	110	17.0635	0.449762	0.467074	0.443816	0.164982	0.494056	0	0	0	0	0	0	0	0	0	0	0	0	0
palatinitol	257	17.0854	0.392815	0	0.336703	0.299062	0.365583	0.58608	0	0.449474	0	0	0.401689	0.535377	0	0.737948	0	0	0	0
Sophorose	233	17.1032	2.54077	2.75542	2.29051	2.73707	3.16257	3.51334	3.8798	3.95525	4.05047	3.8665	3.48683	3.81133	2.71678	3.71962	3.90636	2.74049	3.43484	2.1943
Myristic Acid	117	17.2941	2.62296	2.41934	0	3.33242	2.38873	2.61263	2.77392	2.16287	2.61388	0	2.18141	3.22101	1.34157	0	1.74601	1.93994	2.35776	2.38001
conduritol b epoxide	231	17.3569	0.319131	0.930051	0	0	0.514955	0.932794	0.524982	0	0.629693	0	0	0	1.27548	0.552165	0.785756	0	0.241555	1.22964
adrenaline	251	17.4137	0.269539	0.166225	0.175185	0.176462	0.174535	0.0346271	0.211546	0.115593	0.129908	0.0813384	0.162818	0.157884	0.0833926	0.0805007	0.06364	0.361182	0.0935192	0.135705
adenine	265	17.5278	25.2769	29.1406	10.9062	45.8673	48.4724	23.5572	41.8529	44.3883	62.4585	41.9377	53.3528	50.1773	13.0594	37.9467	20.4318	14.9104	27.2176	7.22314
Saccharic acid	147	17.5478	0	0.6986	0	0	0	0	0	0	1.15815	0	0	0	5.4314	1.39994	0	0	1.00631	1.78502
N-Acetyltryptophan	70	17.6073	0	0.15275	0	0	0.354479	0	0	0	0	0	0	0	0	0	0.265804	0	0	0.324619
Methyl-beta-D-galactopyranoside	204	17.6697	20.7835	14.8982	11.211	20.0165	9.88122	11.8612	14.1792	19.7827	11.2017	16.4938	27.8085	24.1373	24.2918	15.5561	28.7411	13.3173	19.2271	32.4321
Galactinol	204	17.8644	436.956	257.348	205.687	421.079	182.254	355.628	289.981	314.409	303.804	400.679	360.023	414.505	228.251	199.356	360.042	363.326	453.416	322.58
Isopropyl-beta-D-thiogalactopyranoside	257	17.8731	1.82164	1.67161	0	2.29104	0	0	1.5858	0	1.82944	2.19401	1.53873	0	0	0	0	0	0	0
D-Talose	160	17.9073	16.1854	9.33134	16.4296	17.0877	8.78749	14.002	13.9362	15.0189	18.1423	17.7631	26.372	25.3645	17.9815	19.6431	28.4614	27.5705	35.2131	30.778
Hydantoin, 5-(4-hydroxybutyl)-	251	17.9351	0.349444	0.292455	0.689769	0.402188	0.434809	0	0.284692	0.263615	0.181376	0.371323	0.314288	0.424549	0	0	0.603429	0	0	0
Glucosaminic acid	200	18.0599	1.51143	1.22981	0.577184	0.213903	1.40843	0.939302	0.473835	0.270313	0.349147	0.171264	0.478443	0.205244	0.64003	0.182536	0.182345	0.227845	0	0.0884464
alpha-D-glucosamine 1-phosphate	202	18.0771	0	0.181897	0	0	0.236986	0.147398	0.156618	0.124781	0	0.149359	0.0998516	0	0	0	0	0	0	0
tetracosane	57	18.1011	0	0.595105	0.75015	0.737348	0.827245	1.07233	0.675817	0.725363	0.801262	0.926407	0.752687	0.900012	0.407475	0.764771	0.700395	0.963181	0.838309	0.782691
malonic acid	305	18.1517	4.74289	2.20226	0	3.64516	0	1.78345	1.11789	3.38298	2.00197	2.15054	2.24853	1.67541	1.37972	0	1.75553	1.54893	2.30857	3.34777
glucose	283	18.1629	0	0.0796964	0	0	0	0.0910081	0	0	0	0	0	0.104549	0.163447	0	0	0	0	0
histidine	254	18.2801	15.406	18.4684	13.3014	12.8794	14.0207	11.9473	11.7728	17.5875	12.014	7.32073	13.6057	7.82634	7.59339	9.68276	5.15912	4.00376	7.35205	9.88338
lysine	230	18.3497	37.4795	91.2377	34.8953	55.4473	25.4265	41.6526	28.1037	61.7142	46.1108	28.6827	36.1286	30.1389	41.0916	40.9318	29.772	24.8619	43.5171	47.8751
1-Hydroxy-2-naphthoic acid	197	18.3564	0.0947244	0	0	0	0	0.156569	0.0951191	0	0	0	0	0.0992648	0	0	0	0	0	0
Tartronic acid	225	18.4482	0.168272	0	0.195033	0	0.0613405	0.0999491	0	0	0.0144177	0.0366954	0	0.0467996	0.089987	0.0484917	0	0.0648875	0	0.111484
methyl hexadecanoate	87	18.4746	0.226179	0.231998	0.268791	0	0.272718	0	0	0.141182	0	0.178419	0	0	0	0	0	0	0	0
L-cysteine	216	18.5883	0	0.140133	0	0	0.447463	0.368727	0.403926	0.332641	0	0.123924	0.527946	0	0	0	0	0	0	0
D-erythro-sphingosine	204	18.5959	1.09617	6.30019	0.548178	3.84461	2.04584	2.53765	0.484106	1.19335	1.89173	0.659322	0.918436	0.457816	1.47714	1.16207	0.958264	0.312732	0.271149	2.26748
phthalic acid	236	18.6825	0.107207	0.138653	0	0	0.10869	0.193431	0	0.105611	0.133952	0	0	0.113369	0	0	0	0	0	0
pentadecanoic acid	300	18.7775	0.139911	0.124493	0.164249	0.19507	0.14885	0.140115	0.192826	0.15357	0.145725	0.157967	0.199897	0.180857	0.0776612	0.104303	0.125861	0.136017	0.120833	0.136458
1-Hexadecanol	299	18.9947	0.333038	0.318929	0.52472	0.490639	0.575088	0.65935	0.602486	0.628139	0.907538	0.873547	0.823004	0.818493	0.592145	0.727183	0.984758	0.918632	1.0111	0.946197
Atropine	154	19.0063	0	0.178173	0	0	0	0	0	0.181819	0	0	0.0852208	0.109378	0	0	0	0.162609	0.0545419	0
Gluconic lactone	244	19.0741	0.594593	1.77152	0.408546	0.224673	0.828359	1.25046	0.597344	0.467725	1.00592	0.463133	0.753866	0.705636	2.3621	0.856671	1.93842	0.334534	0.267602	0.970988
pantothenic acid	201	19.4191	0.324483	0.419771	0.452229	0.794168	0.647578	0.273722	0.382904	0.299533	0.5101	0.206323	0.298933	0.63593	0.445088	0.743521	0.203632	0.30248	0	0.312196
lactitol	229	19.457	0.526114	0.417596	0.450437	0.414105	0.392583	0.40169	0.255985	0.206613	0.257959	0.240859	0	0.218913	0	0	0	0	0	0
gluconic acid	73	19.5228	4.98674	3.38631	0	4.10715	1.78423	3.5081	3.48888	3.15475	3.5111	2.46499	4.21034	3.30375	3.62915	3.43718	1.522	0	2.23614	2.67956
xanthotoxin	173	19.6711	0.630531	0.404813	1.00421	0.440911	0.434239	0.39913	0.533745	0.426741	0	0.518124	0	0.380884	0.473945	0.352038	0.4196	0.562385	0.402892	0
hexadecane	57	19.6851	0.316777	0	0.45966	0	0.288122	0.436184	0	0.369531	0	0.178931	0.418241	0.347473	0	0.320249	0.271307	0.324711	0.30832	0.303645
palmitic acid	314	19.7839	8.03945	7.89859	7.77825	10.145	9.161	9.96044	10.0801	7.03663	8.75376	8.66334	8.0575	10.639	4.27784	6.04294	7.121	5.86003	8.52207	6.47922
xanthine	231	19.8412	0.607546	1.94699	0.422764	0.248412	0.831665	1.109	0.68536	0.619564	1.07672	0.445653	0.849162	0.86554	4.46534	1.24535	2.5222	0.39162	0.354172	1.04036
myo-inositol	217	19.9652	6.34649	54.9423	7.70384	29.9425	48.7377	19.5561	17.3413	14.8637	13.8362	12.7675	14.2292	35.8442	62.0067	77.6163	25.6191	15.5997	28.2285	28.3632
gly-pro	174	19.9958	6.18591	1.8008	25.4675	3.05605	1.55071	0	5.15126	0.790217	0.747665	0.711884	0	0.444091	1.99659	0	1.5659	6.64379	1.0763	2.40281
palmitoleic acid	199	20.0098	0.24053	0.318002	0.319676	0.416377	0.305242	0.213413	0.298699	0.139816	0.188939	0.184841	0.164912	0.304668	0.0348334	0.26889	0.111897	0.163598	0.294889	0.128114
Glucoheptonic acid	217	20.1949	81.5785	310.056	60.6442	36.2049	134.754	157.484	101.889	86.8315	186.776	75.3063	109.619	105.247	443.026	172.428	374.721	54.6367	41.387	153.596
15-Keto-prostaglandin F2alpha	269	20.4025	0.407846	0.225868	0.260819	0.258541	0.340066	0	0.356678	0.16294	0.308392	0	0.243423	0.260769	0	0	0	0.458868	0	0.250883
22-Ketocholesterol	173	20.5602	9.2029	4.58516	4.6436	6.04938	5.39724	5.53942	5.71378	9.57891	6.66935	8.38737	6.68411	4.89659	2.8853	11.6139	5.17783	2.95563	4.03316	1.36965
3,4-Dihydroxyphenylglycol	281	20.5803	0.0870932	0	0.153934	0	0	0	0	0.103175	0.143103	0	0.0970051	0	0	0	0	0.145883	0	0
1-Kestose	257	20.8154	0.293521	0.153981	0	0	0	0	0.00819479	0	0	0	0.20119	0.201965	0	0	0	0	0.0425389	0
uric acid	230	20.8866	0	0.385874	0.131959	0.30674	0.462628	0.248683	0.153696	0.151585	0.148366	0.210718	0.143628	0.186999	0	0.624961	0.20191	0.146747	0.283023	0
spermine	160	20.9551	0	0	0	0.346111	0.0804987	0	0	0	0	0	0	0	0	0	0	0	0	0
shikimic acid	269	21.0712	0	0	0	0	1.77403	1.24296	0	0	0	0	0	1.69183	0	1.76711	1.96864	0	1.39507	0.98389
5-Aminoimidazole-4-carboxamide	237	21.1252	0	0.253483	0	0.155897	0	0.266241	0.136652	0.202496	1.38003	0.277539	0	0.0931391	0	0	0	0	0	0
ribose-5-phosphate	265	21.2357	0.101595	0.0428597	0.108631	0.0805699	0.0402767	0.0953983	0.059942	0.0782646	0.049945	0.0728008	0.0696643	0.0668113	0.0467458	0.0542159	0.0744557	0.0701405	0	0
Ciliatine	206	21.3412	0.809343	0.49567	0.544865	0.337613	0.50758	0	0.768822	0.313425	0.402238	0.189308	0.405071	0.441377	0.199083	0.237292	0.164553	1.11449	0.206437	0.335182
heptadecanoic acid	117	21.3699	2.69699	3.14557	2.19334	3.02558	4.41621	3.66893	3.18757	3.01001	4.12853	4.02722	3.16573	3.93784	2.40176	2.78317	3.17388	2.52788	3.33782	2.36365
D-Fructose 1,6-bisphosphate	299	21.4425	0.851508	0.524209	0.985322	1.03039	0.393294	1.54991	0	1.11737	1.22687	1.28272	0.706632	0.793248	1.31744	1.07059	0.967849	0.963898	1.54399	2.10084
DL-dihydrosphingosine	204	21.5486	1.13617	0.389396	1.32234	0	0.742206	0	1.30295	1.15291	0	0	0.604738	0.181415	0.93884	0	0.460812	4.41475	0	0.299791
cystine	218	21.6149	0.405647	2.36491	0.347696	1.05248	1.36369	0.516645	0.319909	0.507203	0.945615	0.630541	1.45901	0.373939	4.37078	1.71403	0.366545	0.181749	0.194986	0.601485
spermidine	201	21.8036	2.08118	2.13395	2.84949	2.12076	3.2184	1.73135	2.02807	2.50917	1.73855	1.99093	2.02254	1.36799	3.17391	6.2439	3.11666	3.15259	3.00375	4.64749
tryptophan	202	21.8383	76.2225	36.6175	81.3271	49.9283	55.1996	64.8692	43.7166	48.356	55.1504	32.4556	68.8706	48.7303	33.2079	35.6594	37.8249	36.5521	42.884	50.7293
resveratrol	206	21.9443	2.36005	1.46855	1.73061	1.06445	1.59808	0.388924	2.05697	0.746722	1.07259	0.5577	1.10049	1.26549	0.537967	0.454894	0.497039	1.99437	0.525956	0.489441
kyotorphin	314	21.9745	4.23199	3.91881	5.36495	5.69897	5.92451	5.36794	6.05855	4.53159	6.52154	5.15969	4.25298	5.11759	4.56161	4.51113	5.36858	6.38543	5.28777	7.39713
oleic acid	199	21.9854	0.470282	0.3724	0.469461	0.566215	0.488486	0.416739	0.378449	0.255483	0.299187	0.290152	0.211343	0.50225	0.159226	0.190757	0.272596	0.203599	0.281701	0.241467
Elaidic acid	199	22.0382	0.432445	0.353239	0.370795	0.463175	0.402866	0.382833	0.401267	0.298581	0.314896	0.262379	0.164265	0.429347	0.115108	0.182527	0.246232	0.197287	0.272023	0.294087
daidzein	235	22.0595	0.389362	0.292516	0.244136	0	0	0	0.167945	0	0.26092	0	0	0.330728	0.126505	0	0.275045	0.686264	0	0.580592
stearic acid	117	22.1892	13.1331	13.6641	13.9478	14.648	15.486	14.8802	14.578	14.0301	14.1195	13.6225	12.6558	16.0438	11.002	11.2535	11.9908	13.0053	15.3216	13.8189
estrone	171	22.1955	1.23416	0	0	0.832138	1.52525	0	1.9426	0	1.44025	0	0	1.48239	1.55	2.10548	0.936693	0	0	0
Sucrose-6-Phosphate	231	22.214	1.54357	1.02424	1.655	0.672563	0.541606	1.41771	1.03535	0.781442	0.407706	0.421347	0.571856	1.26462	0.611517	0.586443	0.770207	0.704661	1.01058	0.628834
noradrenaline	174	22.3005	33.3424	4.99033	35.6222	10.6105	10.8345	25.8625	18.5432	23.6402	24.7897	13.3995	8.21935	36.0795	39.1672	22.2482	33.7535	29.1204	19.5137	46.2834
6-phosphogluconic acid	300	22.3795	5.49301	3.25359	6.53646	2.63103	1.85024	5.05279	3.86499	2.61715	1.65628	1.22483	2.09895	4.34218	2.26477	2.20831	3.022	2.85865	3.97519	2.79393
indole-3-acetamide	58	22.4879	0	0	0	0	0.183413	0.276678	0	0.181443	0.267636	0.220758	0	0	0	0	0	0.229473	0.31464	0
fructose-6-phosphate	300	22.5813	0.642275	0.408327	1.17356	0.205284	0.189892	0.554529	0.585492	0.348927	0.298239	0.112156	0.31624	0.681691	0.283035	0.356574	0.472663	0.351649	0.517782	0.511068
2-aminophenol	254	22.6238	0.0831602	0.0880494	0	0.0639445	0.119639	0.0886758	0.131237	0	0	0	0	0	0.0908967	0	0	0	0	0
Cortexolone	235	22.7595	0.0573655	0.064418	0	0.0425123	0.0562572	0	0.0804604	0.0228457	0.0622037	0	0.0828543	0.0490112	0	0.0630256	0.0347898	0.0871201	0	0.0683885
7,8-Dimethylalloxazine	300	22.8961	0.712788	0.423943	0.866285	0.275704	0.283307	0.638092	0.745139	0.275998	0.360117	0.16215	0.162578	0.615233	0.316355	0.205917	0.270579	0.567441	0.369352	0.84231
glucose-6-phosphate	91	23.0415	4.13991	2.97675	3.23659	2.71622	3.8187	2.02277	1.2969	1.31006	1.74255	1.13762	0.976248	1.96542	1.25558	2.22985	0	1.10191	0	2.35995
cis-gondoic acid	129	23.3306	2.65154	2.92586	2.21639	3.08766	3.50673	4.52356	2.98241	2.80199	2.85572	2.07353	2.05262	3.34219	1.34611	1.58981	1.80561	2.10276	1.67909	1.61059
uridine	245	23.429	0.402121	0.735035	0.220087	0.230831	0.375709	0.554581	0.484782	0.4231	0.564748	0.283463	0.414698	0.499899	0.962787	0.484349	0	0.258885	0.686159	0.541419
cytidine-monophosphate degr prod	217	23.4527	0	0	0	0	0	0	0	0	3.29802	1.61444	2.74455	3.02474	3.71676	2.68434	0	1.49512	0	2.37737
2-Monopalmitin	219	23.9878	0	0.194678	0	0.222474	0	0.141885	0	0	0	0	0	0	0	0	0	0	0.128695	0.120579
linolenic acid	91	24.0277	4.54817	3.03791	4.3285	2.59332	3.99105	2.41035	4.48566	2.90594	2.37926	1.30551	1.30296	6.00689	1.7862	2.36892	1.98934	2.04297	4.6858	3.37587
inosine	230	24.0675	18.0784	32.283	6.10471	5.69482	6.49216	16.0981	9.93673	6.52941	6.1202	3.92104	4.22303	5.94774	25.0519	14.5103	5.38491	2.4232	12.6559	9.54033
arachidonic acid	253	24.1136	0	0.0218353	0.0409601	0.0405725	0	0.0530856	0.0338654	0.0691159	0	0.125726	0	0.0405076	0	0	0	0.0888501	0	0
1-Monopalmitin	239	24.1468	0.449065	0.293157	0.328334	0.370832	0.327612	0.403289	0.332242	0.18941	0.305455	0.377516	0.291493	0.264509	0.256951	0.323234	0.316968	0.214555	0.359185	0.548189
linoleic acid	230	24.174	0.231581	0.392202	0.129388	0.307189	0.286003	0.26107	0.407906	0.100861	0.322106	0.275848	0.457712	0.287431	0.268211	0.398754	0.276349	0.178524	0.403696	0.437883
maltotriose	204	24.281	16.9654	27.468	14.9693	21.9691	7.44087	4.99815	14.6509	16.7728	17.0245	17.7428	10.1375	5.84674	6.98679	3.15854	9.6247	8.81534	7.40461	11.2556
Cysteinylglycine	257	24.3052	1.14868	1.19503	0	1.22913	0	0	1.2983	1.38499	1.3082	1.30984	0	0	0.741828	0	0	0	0	0
adenosine	230	24.3616	10.4257	11.743	14.314	9.52246	9.54869	7.92588	13.6806	6.79424	9.57812	9.63663	20.5378	13.0815	20.1288	17.2265	16.5871	7.31696	20.1531	22.1319
Phenyl beta-D-glucopyranoside	169	24.3937	0.28544	0.482012	0	0	0.207233	0.16859	0.430953	0.351462	0	0.433254	0.220788	0.0115018	0	0	0	0	0	0
Maltotriitol	204	24.5113	541.297	486.874	22.9435	790.724	235.218	247.822	524.221	632.036	566.026	751.695	313.367	63.9159	212.857	34.8467	56.19	188.184	63.2308	370.555
Melezitose	202	24.6753	0.0907056	0.0542166	0	0	0	0	0.125012	0.019753	0.112415	0	0.0591131	0	0	0	0	0	0.0378882	0.203401
maltose	233	24.7839	0.399426	0.318901	0.0107901	0.589416	0.169477	0.2212	0.328736	0.457265	0.579811	0.495605	0.541867	0.0873931	0.398213	0.175252	0.117419	0.334874	0.0919344	0.635159
(+-)-Dihydrocarveol	121	24.8767	1.04929	0.984605	0.483986	1.33123	1.02691	1.64753	1.29279	1.1344	1.10642	0.974748	1.26163	1.21433	0.224641	0.395363	0.629199	0.429414	0.78887	0.420319
Threitol	202	24.8854	0	0.0469016	0	0	0.0529374	0	0.0204718	0	0	0	0.0591131	0	0	0	0	0.0788274	0	0.168596
guanosine	245	24.9277	1.23969	2.66155	0.706965	0.963912	1.18976	1.68857	1.59932	1.11276	1.70823	1.22778	1.80432	1.41731	2.1611	1.84326	0.859576	0	2.15642	1.11562
Monostearin	203	24.9875	0.460243	0.293697	0.210744	0.208715	0.353698	0.468146	0.425632	0.223818	0.359686	0.387326	0.409117	0.231392	0.313297	0.326003	0.292897	0.372376	0.339874	0.47395
Allo-inositol	299	25.01	0.588304	1.11221	0	0.230689	0.772506	0.512868	0.50841	0.580751	0.891274	0	0.886747	0.370197	0.49387	0.166794	1.16154	0.677587	0.701522	0.425028
5'-methylthioadenosine	188	25.0566	0.255993	0.290819	0.194516	0	0.228164	0.169347	0	0.345328	0.294882	0	0.513019	0.292255	0.499237	0.325761	0	0	0.323825	0
inosine 5'-monophosphate	230	25.1834	0.228972	0.175172	0.107352	0.0975755	0.0600446	0.126694	0.298556	0.0690207	0.0830072	0.03683	0.0781358	0.117121	0.290583	0.0817003	0	0	0	0
Sedoheptulose	204	25.3506	1.5807	1.10344	0	0.379063	0.276572	1.15317	0.328239	0.53918	0.570571	0.366335	0.876547	1.16146	1.47831	0.677612	1.50944	0.479637	0.616467	0.843097
Diglycerol	103	25.368	5.34585	2.27451	4.0713	4.33721	1.87513	2.33334	2.28422	1.25289	1.43525	0.580821	0.454637	3.16027	0.878527	1.06717	0.884282	1.76588	2.97438	1.74456
5,6-Dimethylbenzimidazole	218	25.3682	0	0	0	0	0.521503	0	1.10002	0.4107	0	0.297398	0.306682	0	0.361013	0	0	0.739239	0	0
glucuronic acid	159	25.7921	5.0686	7.51519	3.15933	2.04808	4.44794	4.81103	4.6536	5.77069	4.441	4.30866	5.29987	3.00377	9.62696	7.70245	4.06229	4.23458	3.24786	6.19006
erythrose 4-phosphate	300	25.809	0.10726	0.0667536	0	0	0	0.151537	0.134689	0	0.0894995	0.0687435	0	0.0765859	0	0	0	0	0	0
phenylacetaldehyde	193	25.9529	0.0936534	0.131366	0.133024	0.147115	0	0	0.146137	0	0.190357	0.702039	0.13467	0	0.423494	0.356121	0.689972	0.16798	0	0.147269
Stigmasterol	97	26.0468	2.88589	2.04614	3.90301	2.41658	3.45014	4.17951	3.0512	2.72856	3.94893	2.9605	2.91547	3.05848	2.77231	2.95817	3.17357	3.82254	3.91893	4.16114
Adenosine 5-monophosphate	230	26.3947	4.53496	0.953869	5.65892	1.0824	0.735671	1.31136	1.73148	0.549907	0.479841	0.691893	2.37468	1.74967	2.24454	1.10809	2.34343	4.69881	1.68061	2.63228
Zymosterol	255	26.8592	0.47733	0.316701	0.798777	0.403868	0.538831	0.644141	0.446534	0.381681	0.50735	0.536169	0.812405	0.509643	0.467377	0.166816	0.514409	0.510934	0.624674	0.764738
cuminic alcohol	119	27.04	0	0	0	0	0	0	0	0	0	0.164483	0	0	0	0.14433	0.180579	0	0	0
cholesterol	213	27.1255	0.422633	0.292633	0.642593	0.396924	0.475973	0.601653	0.422127	0.381256	0.510269	0.471095	0.351135	0.46446	0.377656	0.477645	0.550497	0.607402	0.60168	0.649477
Cholestan-3beta-ol	216	27.2163	0.0822224	0.0799367	0.131922	0.0739663	0.155442	0.132001	0.0707394	0.107803	0.164843	0.0913061	0.0748361	0.114737	0.0815332	0.0897267	0.105406	0.142863	0.125688	0.123494
?Sitosterol	216	27.4077	0	0	0.0315938	0	0.0268505	0	0	0	0.0364228	0	0	0	0	0.0143861	0	0	0.0196308	0.0230006
Gentiobiose	204	30.705	1.02142	1.35424	0	2.97914	0.867229	0	2.92209	3.47818	4.8721	4.03195	0	0	0.992121	0	0	0.611285	0	2.43442
